# Supplementary material
Source: HighWire-hosted journal article supplement (https://tobaccocontrol.bmj.com/content/29/e1/e78)
Supplement: inline-supplementary-material-1 [file inline-supplementary-material-1.pdf]

Table S1. Scottish Council trading standards interactions with PMI consultant and press coverage in the Council area following the consultant's UTPs.

| Scottish Council            | Response to FOI                                                | First known contact between TS/PMI consultant | Media coverage           | Date of media coverage | Quote from media article on the scale or nature of illicit trade in the Scottish Council/City/town or other area                                                                                                                                                                                    |
|-----------------------------|----------------------------------------------------------------|-----------------------------------------------|--------------------------|------------------------|-----------------------------------------------------------------------------------------------------------------------------------------------------------------------------------------------------------------------------------------------------------------------------------------------------|
| Aberdeen City               | Confirmed meeting PMI consultant - Refused access to documents | September 2013                                | Aberdeen Evening Express | 05 March 2014          | The North-East is the third worst area in Scotland. [PMI consultant]                                                                                                                                                                                                                                |
| Aberdeenshire               | Documents released                                             | September 2013                                | Aberdeen Press & Journal | 05 November 2013       | ...former Scotland Yard detective inspector who has been conducting research into the illegal tobacco trade for the industry, said, since the introduction of standardised packaging for cigarettes in Australia in December 2012, the illicit cigarette trade had risen significantly. (Australia) |
|                             |                                                                |                                               | Aberdeen Press & Journal | 21 November 2013       | Sales of illicit tobacco and cigarettes in the North-East are <b>rife</b> .                                                                                                                                                                                                                         |
|                             |                                                                |                                               | Aberdeen Press & Journal | 22 January 2014        | An investigation by a former Scotland Yard detective has uncovered evidence that the trade in illegal tobacco is <b>rife</b> in Inverness.                                                                                                                                                          |
|                             |                                                                |                                               | Aberdeen Press & Journal | 13 February 2015       | ...nearly a third (30.4%) of all cigarettes consumed in Aberdeen were either contraband, counterfeit or 'illicit whites'...                                                                                                                                                                         |
|                             |                                                                |                                               | Buchan Observer          | 04 March 2014          | Aberdeen, Peterhead and Fraserburgh – is the <b>third highest</b> of ten regions across Scotland for locations at which illicit tobacco is sold.                                                                                                                                                    |
|                             |                                                                |                                               | Ellon Times              | 04 March 2014          |                                                                                                                                                                                                                                                                                                     |
|                             |                                                                |                                               | Inverurie Herald         | 04 March 2014          |                                                                                                                                                                                                                                                                                                     |
|                             |                                                                |                                               | Fraserburgh Herald       | 04 March 2014          |                                                                                                                                                                                                                                                                                                     |
| Angus                       | No record of contact                                           | n/a                                           |                          |                        |                                                                                                                                                                                                                                                                                                     |
| Argyll & Bute               | No record of contact                                           | n/a                                           |                          |                        |                                                                                                                                                                                                                                                                                                     |
| Stirling & Clackmannanshire | Documents released                                             | November 2013                                 | Stirling Observer        | 22 November 2013       | ...team was able to buy 44 packs of illegal cigarettes and two 50g quantities of roll-your-own tobacco. During the three day operation, which covered Alloa, Falkirk and Stirling...                                                                                                                |
|                             |                                                                |                                               |                          | 21 February 2014       | Like other Scottish towns and cities, Stirling has illicit cigarettes for sale and that's a problem which needs to be tackled.                                                                                                                                                                      |

|                           |                                                                                  |                |                              |                  |                                                                                                                                                                                                                                                           |
|---------------------------|----------------------------------------------------------------------------------|----------------|------------------------------|------------------|-----------------------------------------------------------------------------------------------------------------------------------------------------------------------------------------------------------------------------------------------------------|
|                           |                                                                                  |                | Daily Record & Sunday Mail   | 21 November 2013 | ...team was able to buy 44 packs of illegal cigarettes and two 50g quantities of roll-your-own tobacco. During the three day operation, which covered Alloa, Falkirk and Stirling...                                                                      |
| Comhairle nan Eilean Siar | No record of contact                                                             | n/a            |                              |                  |                                                                                                                                                                                                                                                           |
| Dumfries & Galloway       | Documents released                                                               | October 2013   | Dumfries & Galloway Standard | 27 November 2013 | Two unnamed Dumfries pubs and a supermarket have been linked to a <b>booming</b> trade in illegal tobacco.                                                                                                                                                |
|                           |                                                                                  |                |                              | 21 February 2014 | His research uncovered a <b>booming</b> trade in illicit whites – non-duty paid cigarettes smuggled in the UK – with brands such as Fest and Jin Ling easily obtainable throughout the town as well as sizeable amounts of roll-your-own tobacco.         |
| Dundee City               | Documents released                                                               | July 2013      | Daily Record & Sunday Mail   | 13 November 2014 | International criminal gangs targeted Inverness in their bid to <b>flood</b> Scotland with fake tobacco which could seriously damage your health – immediately.                                                                                           |
| East Ayrshire             | No record of contact                                                             | n/a            |                              |                  |                                                                                                                                                                                                                                                           |
| East Dunbartonshire       | No record of contact                                                             | n/a            |                              |                  |                                                                                                                                                                                                                                                           |
| East Lothian              | No record of contact                                                             | n/a            |                              |                  |                                                                                                                                                                                                                                                           |
| East Renfrewshire         | No record of contact                                                             | n/a            |                              |                  |                                                                                                                                                                                                                                                           |
| Edinburgh                 | Confirmed meeting & reported intelligence received – refused access to documents | September 2013 | Evening News                 | 21 November 2013 | Edinburgh is being <b>flooded</b> with fake fags by organised Eastern European crime gangs, a former top cop has warned.                                                                                                                                  |
|                           |                                                                                  |                |                              | 23 January 2014  | Illegal cigarettes were bought from <b>one in five venues</b> across the Capital as part of an undercover sting.                                                                                                                                          |
|                           |                                                                                  |                |                              | 04 November 2014 | The amount of illegal tobacco on sale in the Capital has more than <b>doubled</b> in the last year, according to a new study.                                                                                                                             |
|                           |                                                                                  |                | The Scotsman*                | 09 March 2014    | Tobacco smuggling in Scotland has risen by a third in the past two years...Chief Inspector XXXXXXX found that 9.5 per cent of cigarettes on sale in Scotland were either counterfeit, illicit whites or smuggled brands compared to 7.1 per cent in 2011. |
|                           |                                                                                  |                |                              | 10 March 2014    |                                                                                                                                                                                                                                                           |
| Falkirk                   | Refused access due to ongoing investigation                                      | Unknown        | Stirling Observer**          | 22 November 2013 | As above for Stirling & Clackmannanshire                                                                                                                                                                                                                  |
|                           |                                                                                  |                |                              | 21 February 2014 | As above for Stirling & Clackmannanshire                                                                                                                                                                                                                  |
|                           |                                                                                  |                | Daily Record & Sunday Mail   | 21 November 2013 | As above for Stirling & Clackmannanshire                                                                                                                                                                                                                  |
| Fife                      | Documents released                                                               | November 2013  | No Press in the dataset      |                  |                                                                                                                                                                                                                                                           |
| Glasgow City              | Refused to confirm or deny whether it had contact                                | Unknown        | Glasgow Evening Times        | 27 November 2013 | Glasgow is one of the easiest places in the UK to buy illegal tobacco                                                                                                                                                                                     |

|                   |                                                                                                                |              |                                 |                  |                                                                                                                                                                                                                                                                                                                                                                                                                                                                                                              |
|-------------------|----------------------------------------------------------------------------------------------------------------|--------------|---------------------------------|------------------|--------------------------------------------------------------------------------------------------------------------------------------------------------------------------------------------------------------------------------------------------------------------------------------------------------------------------------------------------------------------------------------------------------------------------------------------------------------------------------------------------------------|
|                   |                                                                                                                |              |                                 | 05 November 2015 | Potentially dangerous illegal cigarettes are easier to buy in Glasgow than they were a year ago, it was claimed today.                                                                                                                                                                                                                                                                                                                                                                                       |
| Highland          | No record of Contact                                                                                           | n/a          |                                 |                  |                                                                                                                                                                                                                                                                                                                                                                                                                                                                                                              |
| Inverclyde        | Confirmed meeting and reported intelligence received but no formal actions taken. No actual documents provided | October 2013 | No press in the dataset         |                  |                                                                                                                                                                                                                                                                                                                                                                                                                                                                                                              |
| Mid Lothian       | No record of contact                                                                                           | n/a          |                                 |                  |                                                                                                                                                                                                                                                                                                                                                                                                                                                                                                              |
| Moray             | No record of contact                                                                                           | n/a          |                                 |                  |                                                                                                                                                                                                                                                                                                                                                                                                                                                                                                              |
| North Ayrshire    | No record of contact                                                                                           | n/a          |                                 |                  |                                                                                                                                                                                                                                                                                                                                                                                                                                                                                                              |
| North Lanarkshire | Refused to confirm or deny contact                                                                             | Unknown      | Airdrie & Coatbridge Advertiser | 12 February 2014 | A nationwide study has found evidence that trade in illicit tobacco and cigarettes is <b>rife</b> throughout North Lanarkshire.                                                                                                                                                                                                                                                                                                                                                                              |
| Orkney            | No record of contact                                                                                           | n/a          |                                 |                  |                                                                                                                                                                                                                                                                                                                                                                                                                                                                                                              |
| Perth & Kinross   | No record of contact                                                                                           | n/a          |                                 |                  |                                                                                                                                                                                                                                                                                                                                                                                                                                                                                                              |
| Renfrewshire      | Documents released                                                                                             | October 2013 | Paisley Daily Express           | 21 November 2013 | An investigation into the black market tobacco trade has revealed Paisley is being <b>flooded</b> with dodgy cigarettes that are generating funds for organised crime.                                                                                                                                                                                                                                                                                                                                       |
|                   |                                                                                                                |              |                                 | 27 February 2014 | A study into the trade of illegal tobacco has found evidence that the sale of illicit cigarettes is <b>rife</b> throughout Renfrewshire.                                                                                                                                                                                                                                                                                                                                                                     |
|                   |                                                                                                                |              |                                 | 13 February 2015 | Paisley is today unmasked as a ' <b>hotspot</b> ' for the illegal tobacco trade. A test purchase exercise, led by a former Scotland Yard detective, found that almost 40 per cent of tobacco being offered in the town's shops, pubs and clubs had been smuggled into the country by crooks who were determined to avoid paying tax. That figure is higher than any other town or city in Scotland, including neighbouring Glasgow, where less than a third of the cigarettes sold were found to be illicit. |
| Scottish Borders  | Documents released including spreadsheet of 7 purchases                                                        | October 2013 | No press in the dataset         |                  |                                                                                                                                                                                                                                                                                                                                                                                                                                                                                                              |
| Shetland Island   | No record of Contact                                                                                           | n/a          |                                 |                  |                                                                                                                                                                                                                                                                                                                                                                                                                                                                                                              |
| South Ayrshire    | Documents released                                                                                             | October 2013 | Scottish Star                   | 02 December 2013 | We've been looking at the illicit market for a number of years now. We've gone to some of the well-known hotspots, with the Ayr Sunday Market being in that category. We found that the illicit tobacco trade in Ayr is <b>booming</b> . [PMI consultant]                                                                                                                                                                                                                                                    |
| South Lanarkshire | No record of Contact                                                                                           | n/a          |                                 |                  |                                                                                                                                                                                                                                                                                                                                                                                                                                                                                                              |

|                     |                      |     |  |  |  |
|---------------------|----------------------|-----|--|--|--|
| West Dunbartonshire | No record of Contact | n/a |  |  |  |
| West Lothian        | No record of Contact | n/a |  |  |  |

\* National paper printed in Edinburgh;\*\* These articles are the same as those that covered Stirling & Clackmannanshire
